# Supplementary material for: Crystal growth and properties characterization of Nd3+:Na5Lu(MoO4)4 for continuous multi-wavelength NIR laser emission
Source: Royal Society of Chemistry journal article supplement (doi:10.1039/d1ce00874a), 2021-01-01
Supplement: d1ce00874a1.pdf [file d1ce00874a1.pdf]

Supporting information

## Crystal growth and properties characterization of $\text{Nd}^{3+}:\text{Na}_5\text{Lu}(\text{MoO}_4)_4$ for continuous multi-wavelength NIR laser emission

Lei Geng,<sup>\*a</sup> Shuo Han,<sup>a</sup> Wencai Yi,<sup>a</sup> Shoubao Zhang,<sup>a</sup> Chuanying Shen<sup>a</sup> and Hongyan Lu<sup>a</sup>

<sup>a</sup> School of Physics and Physical Engineering, Qufu Normal University, Qufu 273165, China.

\*Corresponding Author, E-mail: [lgeng.cn@gmail.com](mailto:lgeng.cn@gmail.com)(Lei Geng)

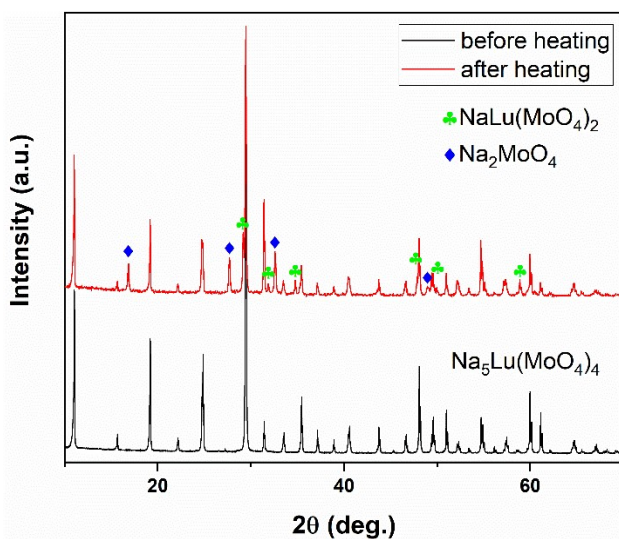

**Fig. S1** Powder X-ray diffraction patterns before and after heating for  $\text{Na}_5\text{Lu}(\text{MoO}_4)_4$ .

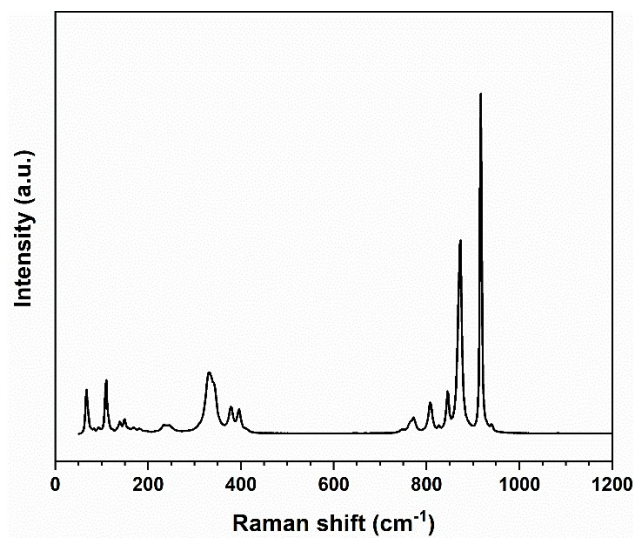

**Fig. S2** Raman spectra for Na<sub>5</sub>Lu(MoO<sub>4</sub>)<sub>4</sub> host powder sample.

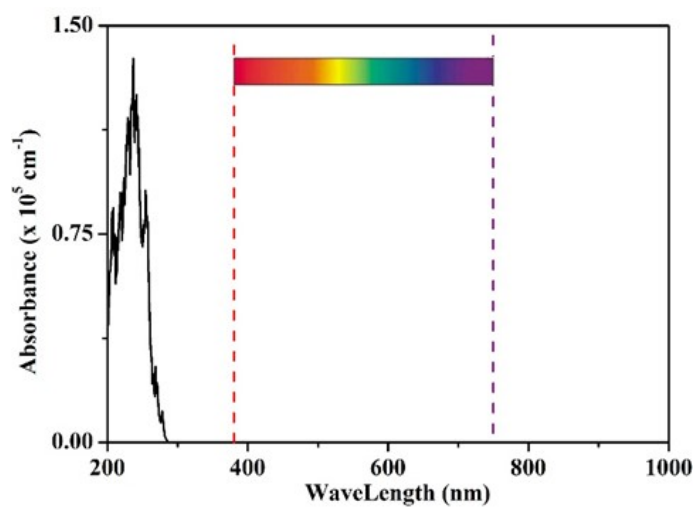

**Fig. S3** Calculated absorption coefficients of Na<sub>5</sub>Lu(MoO<sub>4</sub>)<sub>4</sub>.
